# Supplementary material
Source: HighWire-hosted journal article supplement (https://www.cmajopen.ca/highwire/filestream/80786/field_highwire_adjunct_files/0/open-2013-0073-1-at.pdf)
Supplement: open-2013-0073-1-at.pdf [file open-2013-0073-1-at.pdf]

## Appendix 1 (as supplied by the authors): Search terms and strategies

### The Cochrane Library

- #1 MeSH descriptor Diabetes mellitus, type 2 explode all trees
- #2 MeSH descriptor Insulin resistance explode all trees
- #3 ( (impaired in All Text and glucose in All Text and toleranc\* in All Text) or (glucose in All Text and intoleranc\* in All Text) or (insulin\* in All Text and resistanc\* in All Text) )
- #4 (obes\* in All Text near/6 diabet\* in All Text)
- #5 (MODY in All Text or NIDDM in All Text or TDM2 in All Text)
- #6 ( (non in All Text and insulin\* in All Text and depend\* in All Text) or (noninsulin\* in All Text and depend\* in All Text) or (non in All Text and insulindepend\* in All Text) or noninsulindepend\* in All Text)
- #7 (typ\* in All Text and (2 in All Text near/6 diabet\* in All Text) )
- #8 (typ\* in All Text and (II in All Text near/6 diabet\* in All Text) )
- #9 (non in All Text and (keto\* in All Text near/6 diabet\* in All Text) )
- #10 (nonketo\* in All Text near/6 diabet\* in All Text)
- #11 (adult\* in All Text near/6 diabet\* in All Text)
- #12 (matur\* in All Text near/6 diabet\* in All Text)
- #13 (late in All Text near/6 diabet\* in All Text)
- #14 (slow in All Text near/6 diabet\* in All Text)
- #15 (stabl\* in All Text near/6 diabet\* in All Text)
- #16 (insulin\* in All Text and (defic\* in All Text near/6 diabet\* in All Text) )
- #17 (plurimetabolic in All Text and syndrom\* in All Text)
- #18 (pluri in All Text and metabolic in All Text and syndrom\* in All Text)
- #19 (#1 or #2 or #3 or #4 or #5 or #6 or #7 or #8 or #9 or #10)
- #20 (#11 or #12 or #13 or #14 or #15 or #16 or #17 or #18)
- #21 (#19 or #20)
- #22 MeSH descriptor Diabetes insipidus explode all trees
- #23 (diabet\* in All Text and insipidus in All Text)
- #24 (#22 or #23)
- #25 (#21 and not #24)
- #26 MeSH descriptor Sulfonylurea compounds explode all trees
- #27 (insulin? in All Text and secretagog\* in All Text)
- #28 (acetohexamid\* in All Text or carbutamid\* in All Text or chlorpropamid\* in All Text or tolbutamid\* in All Text or tolazamid\* in All Text)
- #29 (glipizid\* in All Text or gliclazid\* in All Text or glibenclamid\* in All Text or glyburid\* in All Text or gliquidon\* in All Text or glycopyramid\* in All Text)
- #30 glimepirid\* in All Text
- #31 (meglitinid\* in All Text or repaglinid\* in All Text or nateglinid\* in All Text)
- #32 (sulfonylurea\* in All Text or sulphonylurea\* in All Text)
- #33 (glibenese\* in All Text or minidiab\* in All Text or glucotrol\* in All Text or daonil\* in All Text or euglucon\* in All Text or glynase\* in All Text)
- #34 (#26 or #27 or #28 or #29 or #30 or #31 or #32 or #33)
- #35 (#25 and #34)

## **MEDLINE**

1. exp Diabetes Mellitus, Type 2/
2. exp Insulin Resistance/
3. exp Glucose Intolerance/
4. (impaired glucos\$ toleranc\$ or glucos\$ intoleranc\$ or insulin resistanc\$).tw,ot.
5. (obes\$ adj3 diabet\$).tw,ot.
6. (MODY or NIDDM or T2DM).tw,ot.
7. (non insulin\$ depend\$ or noninsulin\$ depend\$ or noninsulin?depend\$ or non insulin?depend\$).tw,ot.
8. ((typ? 2 or typ? II or typ?2 or typ?II) adj3 diabet\$).tw,ot.
9. ((keto?resist\$ or non?keto\$) adj6 diabet\$).tw,ot.
10. (((late or adult\$ or matur\$ or slow or stabl\$) adj3 onset) and diabet\$).tw,ot.
11. or/1-10
12. exp Diabetes Insipidus/
13. diabet\$ insipidus.tw,ot.
14. 12 or 13
15. 11 not 14
16. exp Sulfonylurea Compounds/
17. exp Glyburide/
18. insulin? secretagog\$.tw,ot.
19. (acetoexamid\$ or Carbutamid\$ or Chlorpropamid\$ or Tolbutamid\$ or Tolazamid\$).tw,ot.
20. (Glipizid\$ or Gliclazid\$ or Glibenclamid\$ or glyburid\$ or Gliquidon\$ or Glyclopamid\$).tw,ot.
21. glimepirid\$.tw,ot.
22. (meglitinid\$ or repaglinid\$ or nateglinid\$).tw,ot.
23. (sulfonylurea\$ or sulphonylurea\$).tw,ot.
24. (glibenese\$ or minidiab\$ or Glucotrol\$ or daonil\$ or euglucon\$ or Glynase\$).tw,ot.
25. or/16-24
26. 15 and 25
27. randomized controlled trial.pt.
28. controlled clinical trial.pt.
29. randomi?ed.ab.
30. placebo.ab.
31. clinical trials as topic.sh.
32. randomly.ab.
33. trial.ti.
34. or/27-33
35. Meta-analysis.pt.
36. exp Technology Assessment, Biomedical/
37. exp Meta-analysis/
38. exp Meta-analysis as topic/
39. hta.tw,ot.
40. (health technology adj6 assessment\$).tw,ot.
41. (meta analy\$ or metaanaly\$ or meta?analy\$).tw,ot.

42. ((review\$ or search\$) adj10 (literature\$ or medical database\$ or medline or pubmed or embase or cochrane or cinahl or psycinfo or psyclit or healthstar or biosis or current content\$ or systemat\$)).tw,ot.
43. or/35-42
44. (comment or editorial or historical-article).pt.
45. 43 not 44
46. 34 or 45
47. 26 and 46
48. (animals not (animals and humans)).sh.
49. 47 not 48

### **Embase**

1. exp Diabetes Mellitus, Type 2/
2. exp Insulin Resistance/
3. (MODY or NIDDM or T2D or T2DM).tw,ot.
4. ((typ? 2 or typ? II or typ?II or typ?2) adj3 diabet\*).tw,ot.
5. (obes\* adj3 diabet\*).tw,ot.
6. (non insulin\* depend\* or non insulin?depend\* or noninsulin\* depend\* or noninsulin?depend\*).tw,ot.
7. ((keto?resist\* or non?keto\*) adj3 diabet\*).tw,ot.
8. ((adult\* or matur\* or late or slow or stabl\*) adj3 diabet\*).tw,ot.
9. (insulin\* defic\* adj3 relativ\*).tw,ot.
10. insulin\* resistanc\*.tw,ot.
11. or/1-10
12. exp Diabetes Insipidus/
13. diabet\* insipidus.tw,ot.
14. 12 or 13
15. 11 not 14
16. exp sulfonyleurea derivative/
17. insulin? secretagog\*.tw,ot.
18. exp acetohexamide/
19. exp carbutamide/
20. exp chlorpropamide/
21. exp tolbutamide/
22. exp tolazamide/
23. (acetohexamid\* or carbutamid\* or chlorpropamid\* or tolbutamid\* or tolazamid\*).tw,ot.
24. exp glipizide plus metformin/ or exp glipizide/ or exp glibenclamide/
25. exp gliclazide/
26. exp gliquidone/
27. (glipizid\* or gliclazid\* or glibenclamid\* or glyburid\* or gliquidon\* or glyclopyramid\*).tw,ot.
28. exp glimepiride/
29. glimepirid\*.tw,ot.

30. exp meglitinide/
31. exp repaglinide/
32. exp nateglinide/
33. (meglitinid\* or repaglinid\* or nateglinid\*).tw,ot.
34. (sulfonylurea\* or sulphonylurea\*).tw,ot.
35. (glibenese\* or minidiab\* or glucotrol\* or daonil\* or euglucon\* or glynase\*).tw,ot.
36. or/16-35
37. 15 and 36
38. exp Randomized Controlled Trial/
39. exp Controlled Clinical Trial/
40. exp Clinical Trial/
41. exp Comparative Study/
42. exp Drug comparison/
43. exp Randomization/
44. exp Crossover procedure/
45. exp Double blind procedure/
46. exp Single blind procedure/
47. exp Placebo/
48. exp Prospective Study/
49. ((clinical or control\$ or comparativ\$ or placebo\$ or prospectiv\$ or randomi?ed) adj3 (trial\$ or stud\$)).ab,ti.
50. (random\$ adj6 (allocat\$ or assign\$ or basis or order\$)).ab,ti.
51. ((singl\$ or doubl\$ or trebl\$ or tripl\$) adj6 (blind\$ or mask\$)).ab,ti.
52. (cross over or crossover).ab,ti.
53. or/38-52
54. exp meta analysis/
55. (metaanaly\$ or meta analy\$ or meta?analy\$).ab,ti,ot.
56. ((review\$ or search\$) adj10 (literature\$ or medical database\$ or medline or pubmed or embase or cochrane or cinahl or psycinfo or psyclit or healthstar or biosis or current content\$ or systematic\$)).ab,ti,ot.
57. exp Literature/
58. exp Biomedical Technology Assessment/
59. hta.tw,ot.
60. (health technology adj6 assessment\$).tw,ot.
61. or/54-60
62. 53 or 61
63. 37 and 62
64. (comment or editorial or historical-article).pt.
65. 63 not 64

### **Latin American and Caribbean Health Sciences Literature (LILACS)**

(sulfonylurea OR sulphonylurea) [Words] and diabetes [Words] and not insipidus [Words]

## Science Citation Index Expanded

- # 1 TS=((impaired glucose toleranc\* ) or (glucose intoleranc\* ) or (insulin\* resistanc\*))
- # 2 TS=(obes\* SAME diabet\*)
- # 3 TS=(mody OR NIDDM OR TDM2)
- # 4 TS=((non insulin\* depend\* ) or (noninsulin\* depend\* ) or (non insulindepend\* ) or (noninsulindepend\*))
- # 5 TS=(typ\* AND (2 SAME diabet\*))
- # 6 TS=(typ\* AND (II SAME diabet\*))
- # 7 TS=(non AND (keto\* SAME diabet\*))
- # 8 TS=(nonketo\* SAME diabet\* )
- # 9 TS=(adult\* SAME diabet\*)
- # 10 TS=(matur\* SAME diabet\*)
- # 11 TS=(late SAME diabet\*)
- # 12 TS=(slow SAME diabet\*)
- # 13 TS=(stabl\* SAME diabet\*)
- # 14 TS=(insulin and (defic\* SAME diabet\*))
- # 15 TS=(plurimetabolic syndrom\*)
- # 16 TS=(pluri metabolic syndrom\*)
- # 17 #16 OR #15 OR #14 OR #13 OR #12 OR #11 OR #10 OR #9 OR #8 OR #7 OR #6 OR #5 OR #4 OR #3 OR #2 OR #1
- # 18 TS=(diabet\* insipidus)
- # 19 #17 NOT #18
- # 20 TS=(insulin\* secretagog\*)
- # 21 TS=(acetoexamid\* or carbutamid\* or chlorpropamid\* or tolbutamid\* or tolazamid\*)
- # 22 TS=(glipizid\* or gliclazid\* or glibenclamid\* or glyburid\* or gliquidon\* or glyclopyramid\*)
- # 23 TS=(glimepirid\*)
- # 24 TS=(sulfonyleurea\* or sulphonylurea\*)
- # 25 TS=(glibenese\* or minidiab\* or glucotrol\* or daonil\* or euglucon\* or glynase\*)
- # 26 #25 OR #24 OR #23 OR #22 OR #21 OR #20
- # 27 #26 AND #19
- # 28 TS=((random\* OR controlled OR clinical) AND trial\*) OR placebo\* OR meta-analysis)
- # 29 #28 AND #27

## Cumulative Index to Nursing and Allied Health Literature (CINHAL) (Ovid SP)

- S1 (MM "Diabetes Mellitus, Non-Insulin-Dependent")
- S2 (MM "Insulin Resistance")
- S3 (MM "Glucose Intolerance")
- S4 ( impaired glucos\* toleranc\* or glucos\* intoleranc\* or insulin resistanc\* ) or TI ( impaired glucos\* toleranc\* or glucos\* intoleranc\* or insulin resistanc\* )
- S5 TX obes\* N3 diabet\* or TI obes\* N3 diabet\*
- S6 TX ( MODY or NIDDM or T2DM ) or TI ( MODY or NIDDM or T2DM )

S7 TX ( non insulin\* depend\* or noninsulin\* depend\* or noninsulin?depend\* or non insulin?depend\* ) or TI ( non insulin\* depend\* or noninsulin\* depend\* or noninsulin?depend\* or non insulin?depend\* )

S8 TX ( (typ? 2 or typ? II or typ?2 or typ?II) AND diabet\* ) or TI ( (typ? 2 or typ? II or typ?2 or typ?II) AND diabet\* )

S9 TX ( (keto?resist\* or non?keto\*) AND diabet\* ) and TI ( (keto?resist\* or non?keto\*) AND diabet\* )

S10 TX ( (late or adult\* or matur\* or slow or stabl\*) AND onset AND diabet\* ) or TI ((late or adult\* or matur\* or slow or stabl\*) AND onset AND diabet\* )

S11 S1 or S2 or S3 or S4 or S5 or S6 or S7 or S8 or S9 or S10

S12 (MM "Diabetes Insipidus")

S13 TX diabet\* insipidus or TI diabet\* insipidus

S14 S12 or S13

S15 S11 NOT S14

S16 (MM "Sulfonylurea Compounds")

S17 (MM "Glyburide")

S18 TX insulin\* secretagog\* or TI insulin\* secretagog\*

S19 TX ( acetohexamid\* or Carbutamid\* or Chlorpropamid\* or Tolbutamid\* or Tolazamid\* ) or TI ( acetohexamid\* or Carbutamid\* or Chlorpropamid\* or Tolbutamid\* or Tolazamid\* )

S20 TX ( Glipizid\* or Gliclazid\* or Glibenclamid\* or glyburid\* or Gliquidon\* or Glycropyramid\*) and TI ( Glipizid\* or Gliclazid\* or Glibenclamid\* or glyburid\* or Gliquidon\* or Glycropyramid\* )

S21 TX glimepirid\* or TI glimepirid\*

S22 TX ( meglitinid\* or repaglinid\* or nateglinid\* ) or TI ( meglitinid\* or repaglinid\* or nateglinid\* )

S23 TX ( sulfonylurea\* or sulphonylurea\* ) or TI ( sulfonylurea\* or sulphonylurea\* )

S24 TX ( glibenese\* or minidiab\* or Glucotrol\* or daonil\* or euglucon\* or glynase\* ) or TI ( glibenese\* or minidiab\* or Glucotrol\* or daonil\* or euglucon\* or glynase\* )

S25 S16 or S17 or S18 or S19 or S20 or S21 or S22 or S23 or S24

S26 S15 and S25

S27 TX ( random\* OR blind\* OR placebo\* OR group\* ) or TI ( random\* OR blind\* OR placebo\* OR group\* )

S28 S26 and S27
